# Supplementary material for: Ectomesenchymal Six1 controls mandibular skeleton formation
Source: PubMed Central journal article supplement (PMC9946248; doi:10.3389/fgene.2023.1082911), 2023-02-08
Supplement: Presentation1.pdf [file Presentation1.pdf]

## Supplementary Material

### 1 Supplementary Figures

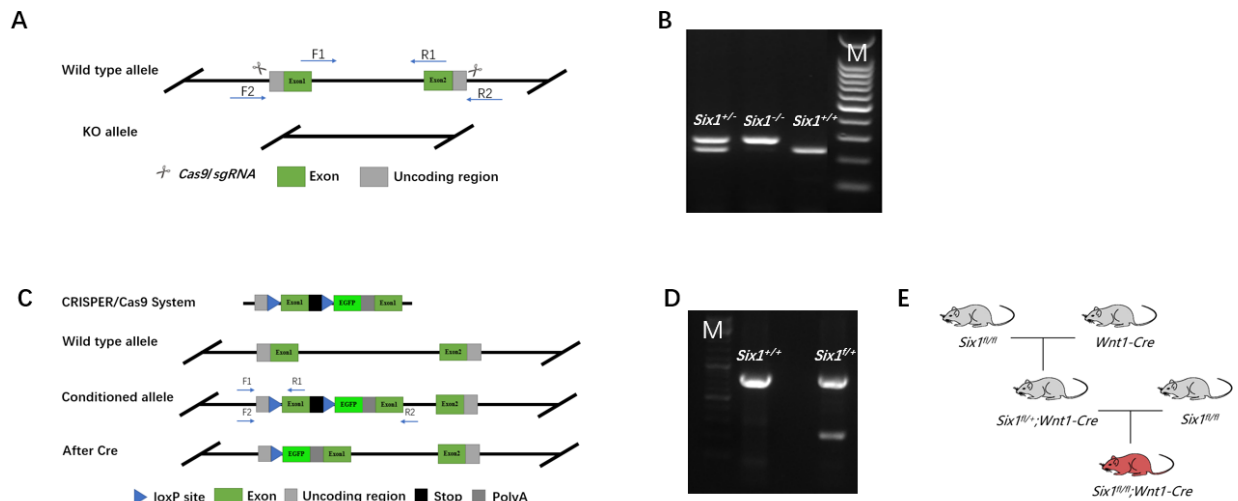

**Supplementary Figure 1.** (A) Schematic diagram of the generation of *Six1* knockout mice. (B) Genotyping of *Six1* knockout mice. *Six1*<sup>-/-</sup> mice have a 298bp band, *Six1*<sup>+/+</sup> mice have a 254bp band, and *Six1*<sup>+/-</sup> mice have both 298bp and 254bp bands. (C) Schematic diagram of the generation of *Six1* conditional knockout mice. (D) Genotyping of *Six1* conditional knockout mice. *Six1*<sup>+/+</sup> mice have a 803bp band, and *Six1*<sup>+/+</sup> mice have both 803bp and 223bp bands. (E) Schematic diagram of the *Six1*<sup>ff</sup>; *Wnt1*-Cre mouse construction strategy. M, Marker.

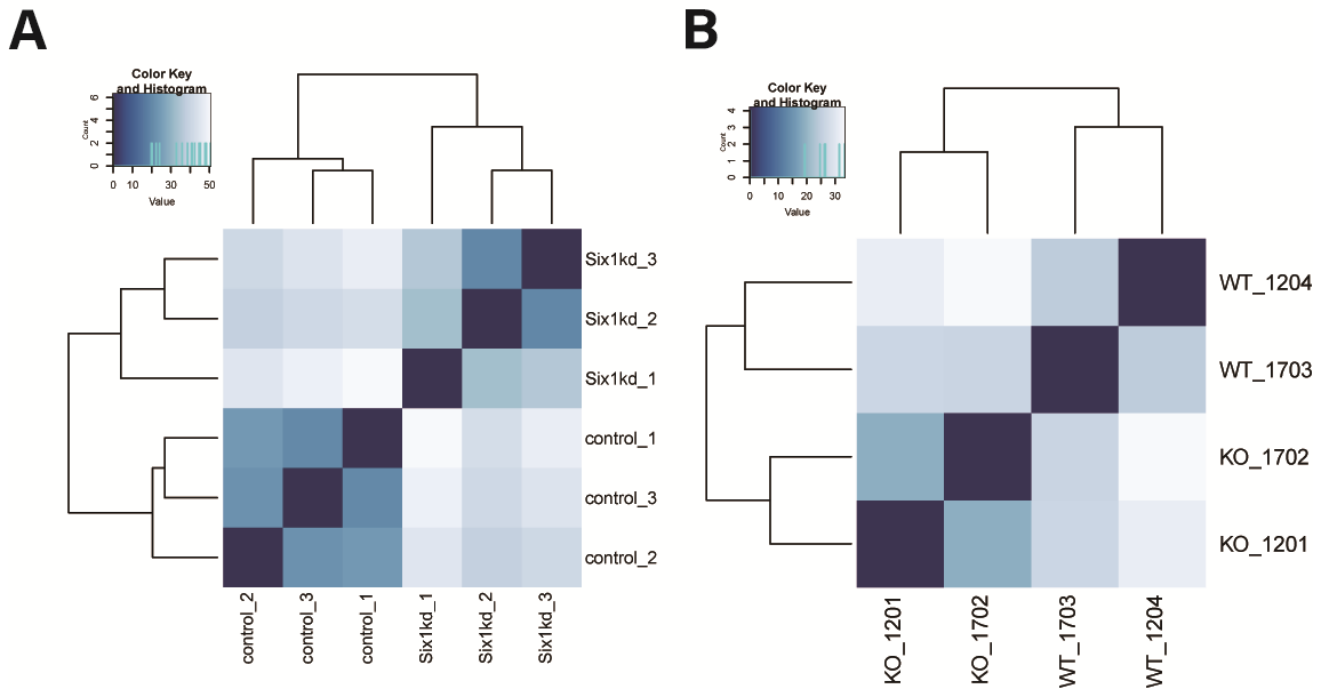

**Supplementary Figure 2.** (A) Correlation matrix for RNA-sequencing of *Six1* knockdown and control C3H10 T1/2 cells. (B) Correlation matrix for RNA-sequencing of *Six1*<sup>-/-</sup> and *Six1*<sup>+/+</sup> embryos at E18.5.

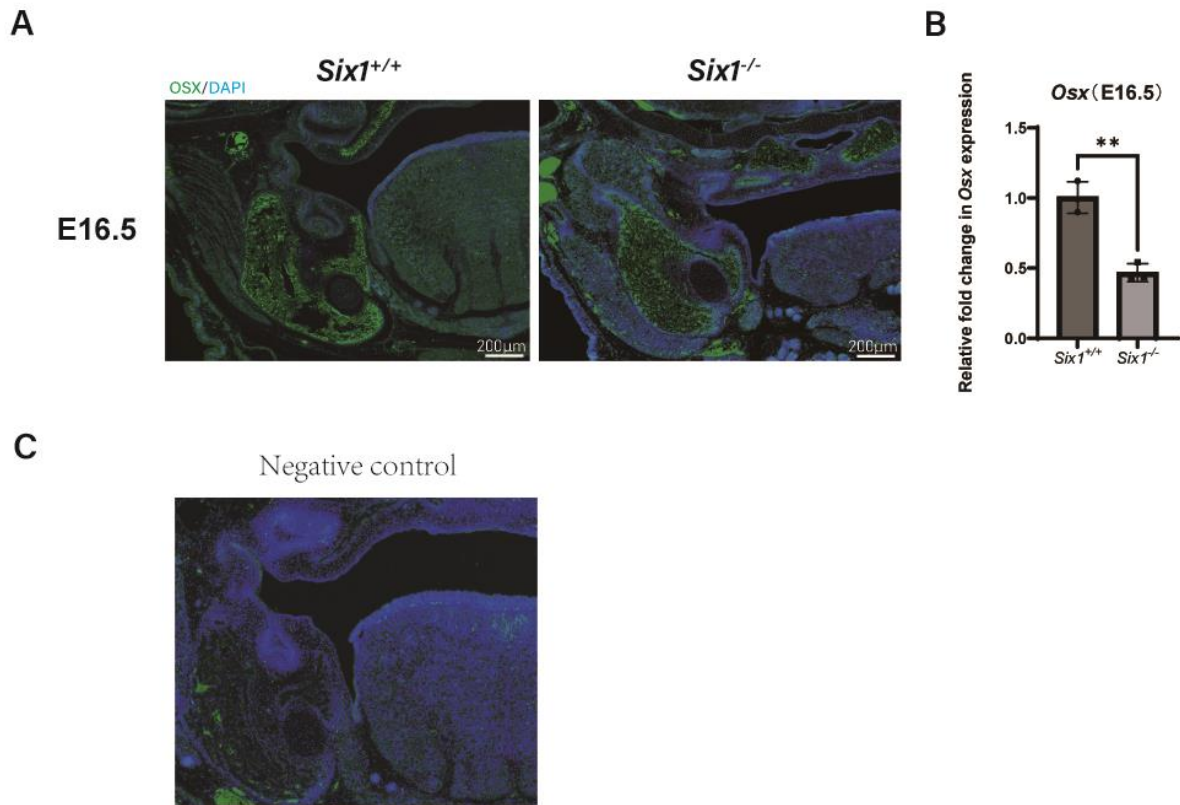

**Supplementary Figure 3.** (A) Immunofluorescence staining of Osx in mandible of *Six1*<sup>-/-</sup> and *Six1*<sup>+/+</sup> embryos at E16.5. (B) RT-qPCR analysis of *Osx* in *Six1*<sup>-/-</sup> and *Six1*<sup>+/+</sup> mandibular tissues at E16.5. (C) Negative controls of the immunofluorescence staining.

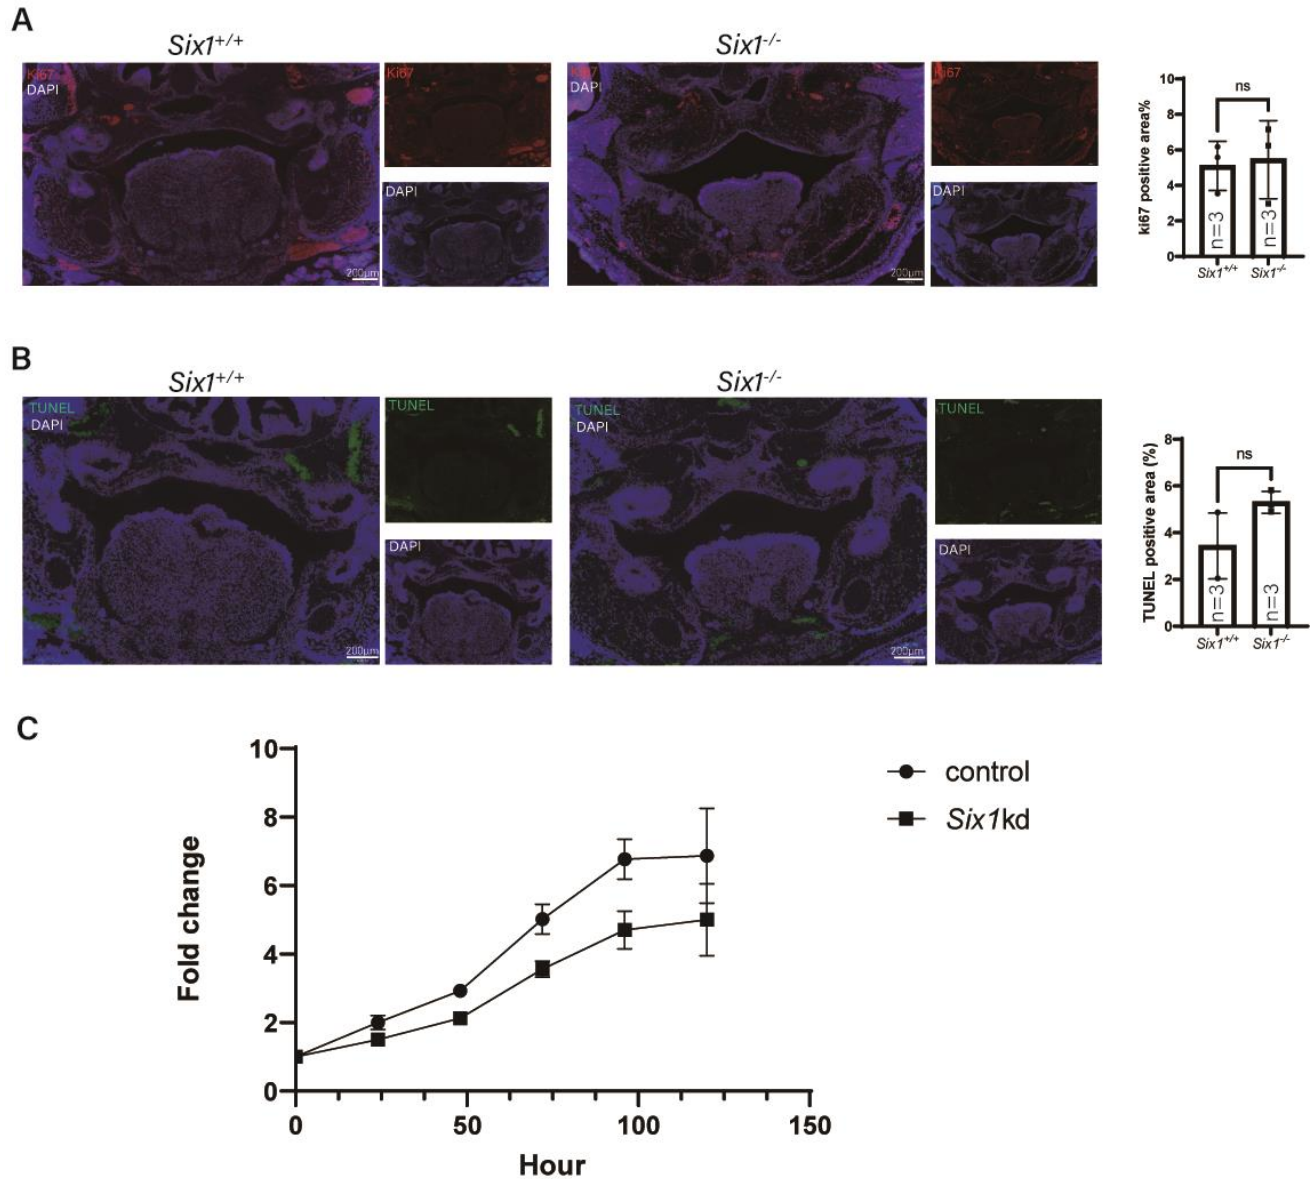

**Supplementary Figure 4.** (A) Immunofluorescence staining of Ki67 in mandible of *Six1*<sup>-/-</sup> and *Six1*<sup>+/+</sup> embryos at E16.5, and the statistical analysis of Ki-67 positive area. (B) TUNEL assay genotyping of *Six1*<sup>-/-</sup> and *Six1*<sup>+/+</sup> embryos at E16.5, and the statistical analysis of TUNEL positive area. (C) Cell proliferation assays were performed for control and *Six1* knockdown C3H10 T1/2 cells at 0, 24, 48, 72, 96, or 120 hours (0–5 days).

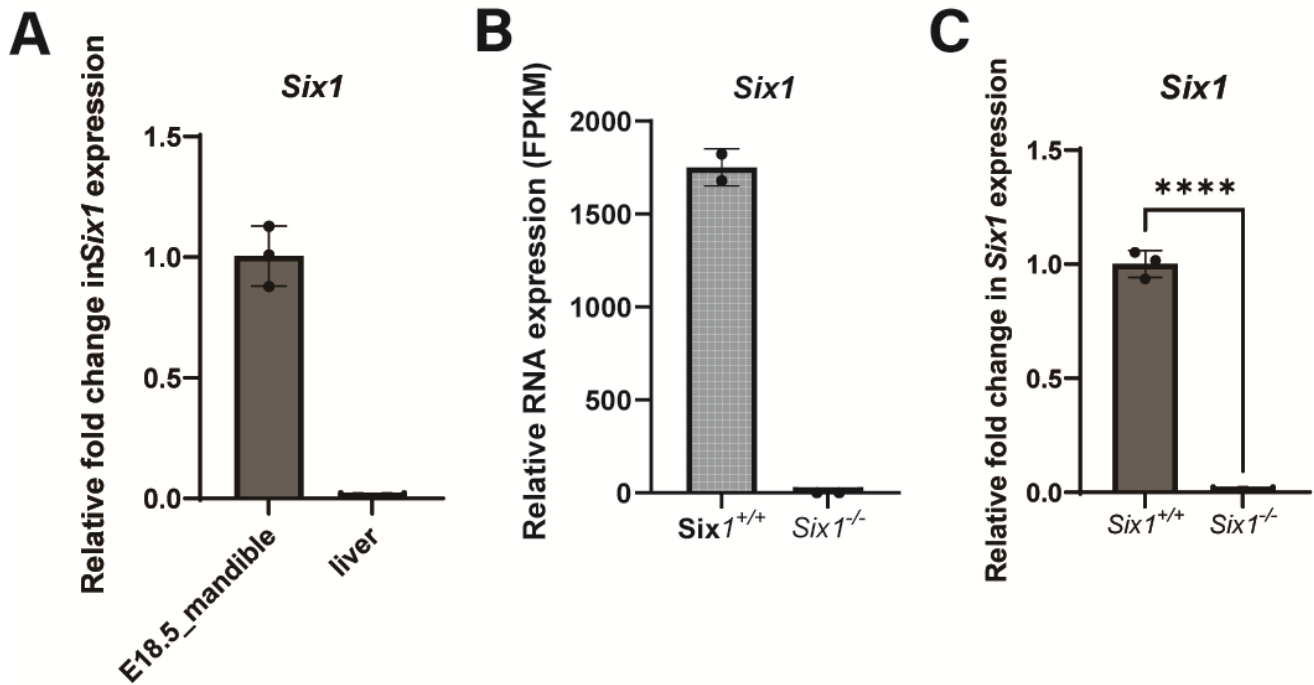

**Supplementary Figure 5.** (A) RT-qPCR analysis of *Six1* in mandible and liver of E18.5 mice. (B) Bar graphs showing the *Six1* expression levels in *Six1*<sup>-/-</sup> and *Six1*<sup>+/+</sup> mandibular tissue according to RNA-seq. (C) RT-qPCR analysis of *Six1* in *Six1*<sup>-/-</sup> and *Six1*<sup>+/+</sup> mandibular tissue at E18.5.

## 2 Supplementary tables

TABLE 1 List of primer sets used for genotyping.

| <b>Mouse model</b>                           |     | <b>Primer (5'-3')</b>      |
|----------------------------------------------|-----|----------------------------|
| <b><i>Six1</i> knockout mice</b>             | F1: | GCCTCTGCACACCAGAGATAGG     |
|                                              | R1: | GAATACGCACATTCTGGATCGG     |
|                                              | F2: | TTGGGTTTGTTCATGCCCTC       |
|                                              | R2: | CGAAATGAAGCAGAACTCTCCTCC   |
| <b><i>Six1</i> conditional knockout mice</b> | F1: | ACTTCTCTTCGTCTTCCTTGGCC    |
|                                              | R1: | GGCCCGATAACTTCGTATAGCATAAC |
|                                              | F2: | ACTTCTCTTCGTCTTCCTTGGCC    |
|                                              | R2: | AAGGGAGCGAAGGGTGAAACTT     |
| <b><i>Wnt1-cre</i></b>                       | F1: | ATTTGCCTGCATTACCGGTCG      |
|                                              | R1: | CAGCATTGCTGTCACTTGGTC      |

TABLE 2 List of primer sets used for RT-qPCR.

| <b>Genes</b> | <b>Forward (5'-3')</b>  | <b>Reverse (5'-3')</b>   |
|--------------|-------------------------|--------------------------|
| <i>Alp</i>   | CGGGACTGGTACTCGGATAA    | ATTCCACGTCGGTTCTGTTC     |
| <i>Osx</i>   | CCTTCCCTCACTCATTTCTGG   | TGTTGCCTGGACCTGGTGAGAT   |
| <i>Ocn</i>   | GAACAGACAAGTCCCACACAG   | GAGCTGCTGTGACATCCATAC    |
| <i>Opn</i>   | AGCAAGAACTCTTCCAAGCAA   | GTGAGATTTCGTCAGATTCATCCG |
| <i>Etv1</i>  | TTAAGTGCAGGCGTCTTCTTC   | GGAGGCCATGAAAAGCCAAA     |
| <i>Fgf18</i> | CCTGCACTTGCCTGTGTTTAC   | TGCTTCCGACTCACATCATCT    |
| <i>Fgfr2</i> | AATCTCCAACCAGAAGCGTA    | CTCCCAATAAGCACTGTCCT     |
| <i>Fat4</i>  | TCAGCCAAACCGAGTCA       | TCCATTACACAGCCCACA       |
| <i>Runx1</i> | GATGGCACTCTGGTCACCG     | GCCGCTCGGAAAAGGACAA      |
| <i>Dlk1</i>  | AGTGCGAAACCTGGGTGTC     | GCCTCCTTGTTGAAAGTGGTCA   |
| <i>Runx2</i> | GGCCGGGAATGATGAGAACTAC  | GGACCGTCCACTGTCACTTT     |
| <i>Bmp4</i>  | TGATACCTGAGACCGGGAAG    | AGCCGGTAAAGATCCCTCAT     |
| <i>Six1</i>  | GAAAGGGAGAACACCGAAAACA  | GTGGCCCATATTGCTCTGGA     |
| <i>Gapdh</i> | CATCACTGCCACCCAGAAGACTG | ATGCCAGTGAGCTTCCCGTTCAG  |

TABLE 3 List of number of input reads and uniquely mapped reads of RNA-sequencing.

| Samples            | Number of input reads | Uniquely mapped reads |
|--------------------|-----------------------|-----------------------|
| C3H10_control_rep1 | 36750192              | 89.66%                |
| C3H10_control_rep2 | 26716583              | 91.18%                |
| C3H10_control_rep3 | 21658547              | 91.04%                |
| C3H10_Six1kd_rep1  | 35031085              | 92.86%                |
| C3H10_Six1kd_rep2  | 35952420              | 92.65%                |
| C3H10_Six1kd_rep3  | 38199370              | 92.71%                |
| Six1_WT_1204       | 38041711              | 87.9%                 |
| Six1_WT_1703       | 36188803              | 88.66%                |
| Six1_KO_1201       | 40664817              | 88.61%                |
| Six1_KO_1702       | 33502150              | 89.23%                |
